# Supplementary material for: Using molecular simulation to predict solute solvation and partition coefficients in solvents of different polarity
Source: Royal Society of Chemistry journal article supplement (doi:10.1039/c1cp20110g), 2011-01-01
Supplement: c1cp20110g.pdf [file c1cp20110g.pdf]

## **SUPPORTING INFORMATION**

### **Using Molecular Simulation to Predict Solute Solvation and Partition Coefficients in Solvents of Different Polarity**

Nuno M. Garrido<sup>1,2</sup>, Miguel Jorge<sup>1</sup>, António J. Queimada<sup>1</sup>,

Eugénia A. Macedo<sup>1</sup> and Ioannis G. Economou<sup>2\*</sup>

1. LSRE Laboratory of Separation and Reaction Engineering, Departamento de Engenharia Química, Faculdade de Engenharia, Universidade do Porto, Rua do Dr. Roberto Frias, 4200 - 465 Porto, Portugal

2. The Petroleum Institute, Department of Chemical Engineering, PO Box 2533, Abu Dhabi, United Arab Emirates

\* Author to whom all correspondence should be addressed at: [ieconomou@pi.ac.ae](mailto:ieconomou@pi.ac.ae)

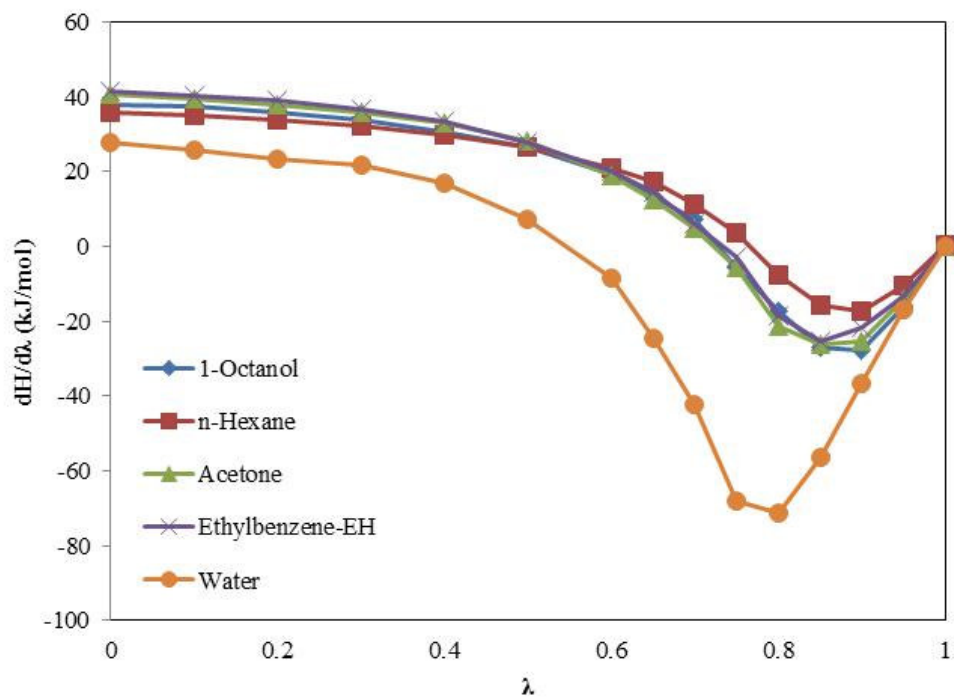

**Figure S1:** Derivative of the total Hamiltonian of the system with respect to the coupling parameter  $\lambda$  for the LJ decoupling of benzene in different solvents.

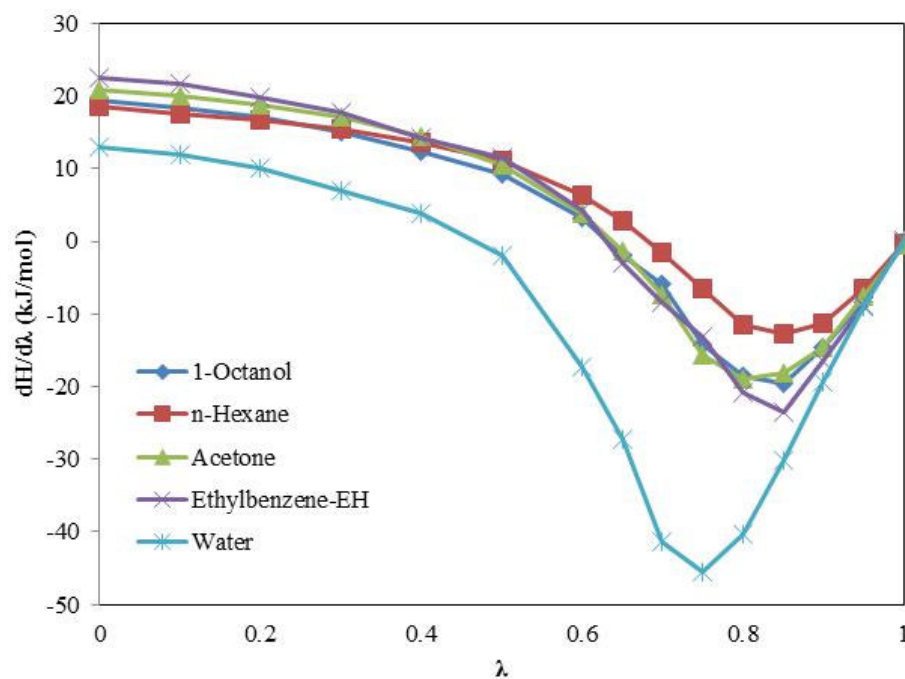

**Figure S2:** Derivative of the total Hamiltonian of the system with respect to the coupling parameter  $\lambda$  for the LJ decoupling of ethanol in different solvents

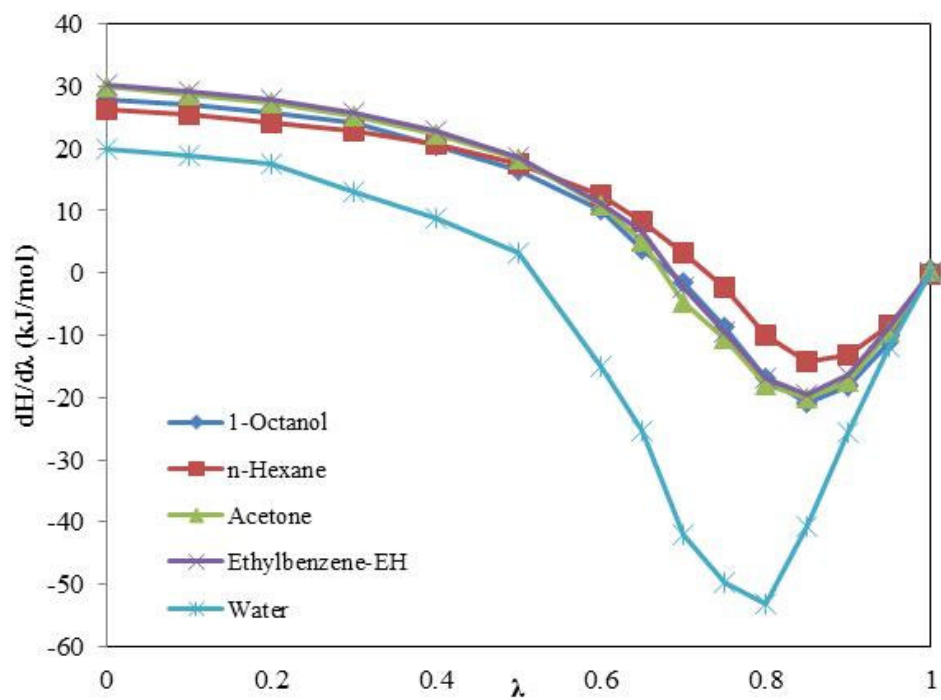

**Figure S3:** Derivative of the total Hamiltonian of the system with respect to the coupling parameter  $\lambda$  for the LJ decoupling of acetone in different solvents.
